# Supplementary material
Source: PubMed Central journal article supplement (PMC4409281)
Supplement: supp_P052217_jlr.P052217-3.pdf [file supp_P052217_jlr.P052217-3.pdf]

**Supplemental Table 3. Plasma fatty acid levels (mg/100mL) after the run-in and wash-out periods and after 4-weeks dietary intervention with omega-3- or phytosterol-enriched milk**

|      | Run-in period | Wash-out period | p-value* | after omega-3-enriched milk intervention | after phytosterol-enriched milk intervention |
|------|---------------|-----------------|----------|------------------------------------------|----------------------------------------------|
| 12:2 | 28.8 ± 3.34   | 27.6 ± 2.74     | 0.778    | 28.7 ± 3.43                              | 27.4± 2.88                                   |
| 12:0 | 26.5 ± 2.22   | 26.3 ± 2.64     | 0.939    | 26.8 ± 1.73                              | 26.6 ± 2.33                                  |
| 13:0 | 0.4 ± 0.23    | 0.4 ± 0.25      | 0.931    | 0.4 ± 0.22                               | 0.2 ± 0.17                                   |
| 14:0 | 41.6 ± 2.71   | 41.0 ± 2.48     | 0.885    | 40.4 ± 2.65                              | 41.2 ± 2.28                                  |
| 15:1 | 0.0 ± 0.00    | 0.3 ± 0.19      | 0.164    | 0.7 ± 0.7                                | 0.3 ± 0.22                                   |
| 15:0 | 2.3 ± 0.76    | 2.0 ± 0.64      | 0.445    | 2.3 ± 0.67                               | 1.6 ± 0.51                                   |
| 16:2 | 7.2 ± 0.97    | 5.7 ± 0.93      | 0.272    | 5.6 ± 0.91                               | 6.5 ± 0.89                                   |
| 16:1 | 475.9 ±36.63  | 490.0 ±27.38    | 0.757    | 484.3 ±23.84                             | 476.6 ±29.74                                 |
| 16:0 | 656.9 ±37.13  | 684.8 ±37.18    | 0.496    | 670.4 ±41.3                              | 660.5 ±36.44                                 |
| 17:0 | 16.1 ± 1.89   | 15.6 ± 1.45     | 0.821    | 15.2 ± 1.79                              | 15.3 ± 1.51                                  |
| 18:3 | 0.3 ± 0.23    | 0.8 ± 0.39      | 0.309    | 0.5 ± 0.30                               | 0.8 ± 0.41                                   |
| 18:2 | 180.8 ±12.65  | 201.1 ±13.87    | 0.275    | 194.3 ±15.55                             | 182.1 ±10.11                                 |
| 18:1 | 334.1 ±27.89  | 352.9 ±29.57    | 0.640    | 344.4 ±28.77                             | 360.7 ±34.38                                 |
| 18:0 | 503.1 ±42.19  | 498.6 ±27.51    | 0.929    | 517.0 ±42.37                             | 506.3 ±25.01                                 |
| 19:0 | 0.7 ± 0.31    | 0.8± 0.39       | 0.924    | 0.4 ± 0.24                               | 0.9 ± 0.45                                   |
| 20:5 | 0.0 ± 0.00    | 0.0 ± 0.00      | ----     | 0.1 ± 0.01                               | 0.0 ± 0.00                                   |
| 20:4 | 0.7 ± 0.34    | 0.6 ± 0.51      | 0.984    | 0.7 ± 0.38                               | 0.2± 0.2                                     |
| 20:3 | 3.8 ± 0.85    | 3.6 ± 0.77      | 0.916    | 3.5 ± 0.83                               | 4.0 ± 0.82                                   |
| 20:2 | 0.0 ± 0.00    | 0.0 ± 0.00      | ----     | 0.0 ± 0.00                               | 0.0 ± 0.00                                   |
| 20:1 | 0.1 ± 0.09    | 0.3 ± 0.24      | 0.330    | 0.3± 0.19                                | 0.4± 0.36                                    |
| 20:0 | 15.9 ± 1.62   | 15.1 ± 1.40     | 0.701    | 15.1 ± 1.71                              | 15.1 ± 1.54                                  |
| 22:6 | 0.3 ± 0.19    | 0.3 ± 0.20      | 0.984    | 0.4 ± 0.27                               | 0.1 ± 0.13                                   |
| 22:0 | 18.7 ± 2.19   | 22.2 ± 1.62     | 0.200    | 20.8 ± 2.09                              | 21.5 ± 1.76                                  |
| 24:6 | 7.2 ± 1.06    | 7.4 ± 0.97      | 0.859    | 6.1 ± 0.91                               | 6.7± 1.17                                    |
| 24:1 | 14.2 ± 1.74   | 12.8 ± 1.41     | 0.579    | 14.2 ± 1.82                              | 13.9 ± 1.68                                  |
| 24:0 | 16.2 ± 1.74   | 19.9 ± 1.65     | 0.122    | 18.7 ± 1.88                              | 17.9 ± 1.75                                  |
| 26:2 | 16.6 ± 1.68   | 17.5 ± 1.87     | 0.707    | 17.4 ± 1.64                              | 17.0 ± 1.48                                  |
| 26:1 | 0.0 ± 0.00    | 0.3 ± 0.19      | 0.158    | 0.1 ± 0.01                               | 0.2 ± 0.13                                   |

\*difference in plasma values after Run-in and wash-out periods were assessed by T-Student; p ≤ 0.05 indicates statistical significance
