# Supplementary material
Source: PubMed Central journal article supplement (PMC4409281)
Supplement: supp_P052217_jlr.P052217-4.pdf [file supp_P052217_jlr.P052217-4.pdf]

**Supplemental Table 4. Level of LDL-lipid-metabolite at baseline and after intervention with phytosterol- or omega-3-supplemented milk on the LDL-lipidome.**

| Lipid                     | Phytosterol enriched milk intervention |                   |                           |                                      | Omega-3 enriched milk intervention |                     |                           |                                      |
|---------------------------|----------------------------------------|-------------------|---------------------------|--------------------------------------|------------------------------------|---------------------|---------------------------|--------------------------------------|
|                           | before                                 | after             | <i>T-Student p-value*</i> | <i>After FDR Adjustment q-value#</i> | before                             | after               | <i>T-Student p-value*</i> | <i>After FDR Adjustment q-value#</i> |
| <i>Cholesteryl esters</i> |                                        |                   |                           |                                      |                                    |                     |                           |                                      |
| <b>CE 16:0</b>            | 0.6 ± 0.28                             | 0.6 ± 0.05        | 0.904                     | 0.904                                | 0.6 ± 0.07                         | 0.6 ± 0.06          | 0.604                     | 0.842                                |
| <b>CE 16:1</b>            | 0.3 ± 0.08                             | 0.2 ± 0.07        | 0.479                     | 0.904                                | 0.2 ± 0.07                         | 0.1 ± 0.06          | 0.292                     | 0.842                                |
| <b>CE 18:1</b>            | 2.7 ± 0.17                             | 2.7 ± 0.22        | 0.705                     | 0.904                                | 2.9 ± 0.25                         | 2.8 ± 0.23          | 0.655                     | 0.842                                |
| <b>CE 18:2</b>            | 22.9 ± 1.56                            | 22.7 ± 1.61       | 0.899                     | 0.904                                | 23.2 ± 1.53                        | 23.2 ± 1.75         | 0.655                     | 0.842                                |
| <b>CE 18:3</b>            | 1.2 ± 0.08                             | 1.1 ± 0.09        | 0.656                     | 0.904                                | 1.1 ± 0.10                         | 1.1 ± 0.09          | 0.996                     | 0.996                                |
| <b>CE 20:3</b>            | 0.7 ± 0.05                             | 0.6 ± 0.07        | 0.336                     | 0.904                                | 0.7 ± 0.08                         | 0.7 ± 0.07          | 0.874                     | 0.983                                |
| <b>CE 20:4</b>            | 9.8 ± 0.71                             | 9.9 ± 0.67        | 0.893                     | 0.904                                | 9.9 ± 0.76                         | 9.5 ± 0.71          | 0.468                     | 0.842                                |
| <b>CE 20:5</b>            | <b>2.2 ± 0.36</b>                      | <b>1.9 ± 0.31</b> | <b>0.050</b>              | <b>0.435</b>                         | <b>1.7 ± 0.23</b>                  | <b>2.8 ± 0.30</b>   | <b>0.000</b>              | <b>0.000</b>                         |
| <b>CE 22:6</b>            | 2.1 ± 0.22                             | 2.0 ± 0.20        | 1.754                     | 0.904                                | <b>2.0 ± 0.18</b>                  | <b>2.3 ± 0.21</b>   | <b>0.041</b>              | <b>0.153</b>                         |
| <i>Sphingomyelins</i>     |                                        |                   |                           |                                      |                                    |                     |                           |                                      |
| <b>SM 30:3;4</b>          | 62.5 ± 5.25                            | 57.9 ± 4.00       | 0.278                     | 0.524                                | 63.2 ± 6.75                        | 71.4 ± 14.38        | 0.547                     | 0.187                                |
| <b>SM 32:2;3</b>          | 30.1 ± 4.13                            | 29.9 ± 2.88       | 0.825                     | 0.851                                | 35.1 ± 4.25                        | 37.1 ± 8.13         | 0.782                     | 0.782                                |
| <b>SM 32:3;4</b>          | 709.2 ± 47.25                          | 644.6 ± 40.50     | 0.169                     | 0.524                                | 734.2 ± 75.75                      | 799.6 ± 135.5       | 0.614                     | 0.778                                |
| <b>SM 34:0;2</b>          | 6.2 ± 1.88                             | 4.1 ± 1.88        | 0.401                     | 0.524                                | 6.6 ± 1.63                         | 8.1 ± 2.25          | 0.462                     | 0.778                                |
| <b>SM 34:2;2</b>          | 90.7 ± 6.13                            | 81.8 ± 5.63       | 0.165                     | 0.524                                | 93.5 ± 8.00                        | 98.2 ± 13.38        | 0.732                     | 0.778                                |
| <b>SM 34:3;4</b>          | 119.2 ± 8.00                           | 110.7 ± 8.13      | 0.326                     | 0.524                                | 124.7 ± 13.13                      | 133.0 ± 21.00       | 0.690                     | 0.778                                |
| <b>SM 36:1;4</b>          | 15.0 ± 5.50                            | 19.4 ± 5.25       | 0.478                     | 0.580                                | 17.0 ± 5.25                        | 13.5 ± 5.25         | 0.509                     | 0.778                                |
| <b>SM 36:2;2</b>          | 56.5 ± 4.38                            | 52.2 ± 4.00       | 0.348                     | 0.524                                | 58.7 ± 5.25                        | 62.0 ± 8.88         | 0.705                     | 0.778                                |
| <b>SM 38:1;2</b>          | 59.9 ± 10.00                           | 52.0 ± 10.00      | 0.395                     | 0.524                                | <b>43.4 ± 7.75</b>                 | <b>72.0 ± 11.50</b> | <b>0.011</b>              | <b>0.778</b>                         |
| <b>SM 38:2;3</b>          | 30.1 ± 3.88                            | 29.2 ± 3.25       | 0.851                     | 0.851                                | 33.5 ± 3.63                        | 36.2 ± 6.38         | 0.646                     | 0.778                                |
| <b>SM:1;2</b>             | 197.4 ± 14.00                          | 174.2 ± 14.13     | 0.087                     | 0.524                                | 197.4 ± 21.50                      | 213.2 ± 30.13       | 0.643                     | 0.778                                |
| <b>SM 40:2;2</b>          | 67.5 ± 7.63                            | 68.9 ± 7.50       | 0.823                     | 0.851                                | 74.9 ± 11.38                       | 80.4 ± 9.88         | 0.674                     | 0.778                                |
| <b>SM 40:2;3</b>          | 99.0 ± 10.13                           | 89.6 ± 9.00       | 0.231                     | 0.524                                | 98.0 ± 12.38                       | 114.0 ± 18.13       | 0.396                     | 0.778                                |
| <b>SM 40:3;3</b>          | 64.4 ± 6.63                            | 60.1 ± 5.75       | 0.342                     | 0.524                                | 65.2 ± 7.88                        | 73.4 ± 14.00        | 0.520                     | 0.778                                |
| <b>SM 40:3;4</b>          | 128.2 ± 9.50                           | 115.1 ± 9.25      | 0.153                     | 0.524                                | 129.5 ± 14.00                      | 142.5 ± 22.75       | 0.588                     | 0.778                                |

Supplemental Table 4. Continued

| Lipid                       | Phytosterol enriched milk intervention |                      |                                     |                                                          | Phytosterol enriched milk intervention |                     |                                     |                                                          |
|-----------------------------|----------------------------------------|----------------------|-------------------------------------|----------------------------------------------------------|----------------------------------------|---------------------|-------------------------------------|----------------------------------------------------------|
|                             | before                                 | after                | <i>T-Student</i><br><i>p-value*</i> | <i>After FDR</i><br><i>Adjustment</i><br><i>q-value#</i> | before                                 | after               | <i>T-Student</i><br><i>p-value*</i> | <i>After FDR</i><br><i>Adjustment</i><br><i>q-value#</i> |
| <b>SM 42:2;2</b>            | 369.5 ± 25.38                          | 338.9 ± 25.38        | 0.261                               | 0.524                                                    | 390.6 ± 43.63                          | 424.0 ± 65.50       | 0.615                               | 0.778                                                    |
| <b>SM 42:3;2</b>            | 121.4 ± 8.75                           | 111.1 ± 9.50         | 0.321                               | 0.524                                                    | 129.2 ± 13.38                          | 145.8 ± 25.88       | 0.493                               | 0.778                                                    |
| <i>Glycerophospholipids</i> |                                        |                      |                                     |                                                          |                                        |                     |                                     |                                                          |
| <b>LPC 16:0</b>             | <b>40.5 ± 3.25</b>                     | <b>34.1 ± 3.00</b>   | <b>0.037</b>                        | <b>0.080</b>                                             | 39.4 ± 4.75                            | 47.2 ± 8.25         | 0.346                               | 0.977                                                    |
| <b>LPC 18:0</b>             | 16.9 ± 4.13                            | 13.1 ± 3.63          | 0.417                               | 0.307                                                    | <b>12.5 ± 3.63</b>                     | <b>23.5 ± 5.50</b>  | <b>0.040</b>                        | <b>0.473</b>                                             |
| <b>PC 30:0</b>              | 12.0 ± 3.88                            | 14.0 ± 3.38          | 0.637                               | 0.398                                                    | 13.0 ± 4.50                            | 10.6 ± 7.75         | 0.802                               | 0.977                                                    |
| <b>PC 30:1</b>              | 21.5 ± 8.88                            | 29.9 ± 7.88          | 0.454                               | 0.307                                                    | 20.9 ± 7.50                            | 21.7 ± 15.00        | 0.954                               | 0.977                                                    |
| <b>PC 32:0</b>              | 54.1 ± 3.38                            | 47.9 ± 3.25          | 0.084                               | 0.117                                                    | 56.0 ± 5.00                            | 61.0 ± 10.50        | 0.622                               | 0.977                                                    |
| <b>PC 32:1</b>              | 38.9 ± 3.88                            | 30.4 ± 3.00          | 0.093                               | 0.121                                                    | 36.0 ± 3.88                            | 38.9 ± 8.25         | 0.709                               | 0.977                                                    |
| <b>PC 34:1</b>              | <b>658.1 ± 45.63</b>                   | <b>566.5 ± 42.3</b>  | <b>0.032</b>                        | <b>0.080</b>                                             | 669.0 ± 57.88                          | 691.6 ± 133.5       | 0.841                               | 0.977                                                    |
| <b>PC 34:2</b>              | 1268.9 ± 72.88                         | 1135.5 ± 83.00       | 0.135                               | 0.153                                                    | 1307.0 ± 144.1                         | 1358.3 ± 197.5      | 0.816                               | 0.977                                                    |
| <b>PC 34:3</b>              | <b>27.1 ± 3.13</b>                     | <b>21.5 ± 2.88</b>   | <b>0.014</b>                        | <b>0.080</b>                                             | 26.9 ± 4.13                            | 27.9 ± 5.38         | 0.864                               | 0.977                                                    |
| <b>PC 36:0</b>              | 8.5 ± 3.13                             | 11.1 ± 3.25          | 0.549                               | 0.352                                                    | 8.4 ± 3.13                             | 14.2 ± 3.38         | 0.308                               | 0.977                                                    |
| <b>PC 36:1</b>              | 203.9 ± 18.38                          | 173.5 ± 14.38        | 0.074                               | 0.117                                                    | 188.8 ± 20.5                           | 205.9 ± 37.25       | 0.648                               | 0.977                                                    |
| <b>PC 36:2</b>              | 672.6 ± 43.5                           | 591.1 ± 48.00        | 0.080                               | 0.117                                                    | 663.9 ± 73.50                          | 725.4 ± 108.9       | 0.606                               | 0.977                                                    |
| <b>PC 36:3</b>              | <b>346.5 ± 23.88</b>                   | <b>299.3 ± 23.00</b> | <b>0.034</b>                        | <b>0.080</b>                                             | 348.2 ± 34.75                          | 367.6 ± 72.13       | 0.778                               | 0.977                                                    |
| <b>PC 36:4</b>              | 459.5 ± 32.25                          | 406.1 ± 29.75        | 0.097                               | 0.117                                                    | 458.6 ± 47.50                          | 463.0 ± 71.63       | 0.952                               | 0.977                                                    |
| <b>PC 36:5</b>              | <b>76.6 ± 18.25</b>                    | <b>41.3 ± 7.38</b>   | <b>0.050</b>                        | <b>0.084</b>                                             | <b>52.3 ± 9.25</b>                     | <b>90.5 ± 15.50</b> | <b>0.008</b>                        | <b>0.172</b>                                             |
| <b>PC 38:3</b>              | 90.1 ± 8.38                            | 79.4 ± 10.88         | 0.223                               | 0.219                                                    | 84.0 ± 10.25                           | 93.4 ± 22.50        | 0.683                               | 0.977                                                    |
| <b>PC 38:4</b>              | 259.0 ± 23.63                          | 233.4 ± 24.75        | 0.271                               | 0.219                                                    | 257.7 ± 28.00                          | 263.1 ± 39.25       | 0.898                               | 0.977                                                    |
| <b>PC 38:5</b>              | <b>114.3 ± 13.63</b>                   | <b>86.8 ± 7.38</b>   | <b>0.038</b>                        | <b>0.084</b>                                             | 100.7 ± 9.75                           | 127.1 ± 20.13       | 0.157                               | 0.977                                                    |
| <b>PC 38:6</b>              | 216.1 ± 22.75                          | 188.4 ± 17.13        | 0.161                               | 0.168                                                    | 209.2 ± 25.25                          | 269.6 ± 46.38       | 0.154                               | 0.977                                                    |
| <b>PC 40:6</b>              | 73.4 ± 8.13                            | 66.0 ± 6.50          | 0.268                               | 0.219                                                    | 71.1 ± 8.88                            | 93.2 ± 15.63        | 0.142                               | 0.977                                                    |
| <b>PE 34:2</b>              | <b>0.8 ± 0.13</b>                      | <b>0.3 ± 0.13</b>    | <b>0.015</b>                        | <b>0.080</b>                                             | 0.8 ± 0.13                             | 0.8 ± 0.13          | 1.000                               | 0.999                                                    |
| <b>PE 36:2</b>              | <b>1.3 ± 0.25</b>                      | <b>0.8 ± 0.13</b>    | <b>0.028</b>                        | <b>0.080</b>                                             | 1.4 ± 0.38                             | 1.3 ± 0.25          | 0.854                               | 0.977                                                    |
| <b>PE 36:3</b>              | 1.0 ± 0.25                             | 0.8 ± 0.25           | 0.260                               | 0.219                                                    | 1.0 ± 0.25                             | 1.0 ± 0.25          | 0.773                               | 0.977                                                    |
| <b>PE 38:4</b>              | 2.0 ± 0.50                             | 1.5 ± 0.25           | 0.233                               | 0.219                                                    | 2.1 ± 0.63                             | 2.1 ± 0.50          | 0.912                               | 0.977                                                    |
| <b>PE 38:6</b>              | 1.5 ± 0.50                             | 1.1 ± 0.25           | 0.449                               | 0.307                                                    | 1.8 ± 0.50                             | 2.3 ± 0.63          | 0.369                               | 0.977                                                    |

**Supplemental Table 4. Continued**

| Lipid           | Phytosterol enriched milk intervention |                    |                                     |                                                          | Phytosterol enriched milk intervention |                   |                                     |                                                          |
|-----------------|----------------------------------------|--------------------|-------------------------------------|----------------------------------------------------------|----------------------------------------|-------------------|-------------------------------------|----------------------------------------------------------|
|                 | before                                 | after              | <i>T-Student</i><br><i>p-value*</i> | <i>After FDR</i><br><i>Adjustment</i><br><i>q-value#</i> | before                                 | after             | <i>T-Student</i><br><i>p-value*</i> | <i>After FDR</i><br><i>Adjustment</i><br><i>q-value#</i> |
| <b>LPS 14:1</b> | 17.6 ± 3.00                            | 17.5 ± 3.13        | 0.920                               | <b>0.535</b>                                             | 18.4 ± 3.25                            | 17.2 ± 2.88       | 0.430                               | 0.977                                                    |
| <b>LPS 16:0</b> | <b>4.2 ± 1.25</b>                      | <b>2.6 ± 0.63</b>  | <b>0.050</b>                        | <b>0.084</b>                                             | 3.2 ± 0.88                             | 4.2 ± 1.25        | 0.084                               | 0.903                                                    |
| <b>LPS 18:0</b> | 2.4 ± 0.63                             | 2.0 ± 0.50         | 0.447                               | 0.30                                                     | <b>1.5 ± 0.38</b>                      | <b>2.4 ± 0.50</b> | <b>0.033</b>                        | <b>0.473</b>                                             |
| <b>LPS 24:5</b> | 13.5 ± 2.25                            | 13.2 ± 2.25        | 0.806                               | 0.480                                                    | 13.4 ± 2.25                            | 12.5 ± 2.13       | 0.501                               | 0.977                                                    |
| <b>LPS 30:3</b> | 5.2 ± 0.88                             | 4.9 ± 0.88         | 0.438                               | 0.307                                                    | 4.9 ± 0.88                             | 4.7 ± 0.88        | 0.850                               | 0.977                                                    |
| <b>PS 20:6</b>  | 16.6 ± 2.38                            | 15.6 ± 2.63        | 0.250                               | 0.219                                                    | 16.5 ± 2.38                            | 17.1 ± 2.25       | 0.777                               | 0.977                                                    |
| <b>PS 26:4</b>  | 8.1 ± 1.13                             | 7.1 ± 1.00         | 0.156                               | 0.168                                                    | 7.2 ± 1.00                             | 6.9 ± 1.00        | 0.724                               | 0.977                                                    |
| <b>PS 28:0</b>  | 12.6 ± 2.63                            | 12.0 ± 2.38        | 0.467                               | 0.307                                                    | 11.0 ± 2.00                            | 12.1 ± 2.50       | 0.290                               | 0.977                                                    |
| <b>PS 32:2</b>  | <b>3.4 ± 0.38</b>                      | <b>2.3 ± 0.38</b>  | <b>0.035</b>                        | <b>0.080</b>                                             | 3.2 ± 0.38                             | 3.7 ± 0.88        | 0.492                               | 0.977                                                    |
| <b>PS 34:1</b>  | <b>5.6 ± 0.88</b>                      | <b>3.9 ± 0.63</b>  | <b>0.030</b>                        | <b>0.080</b>                                             | 4.7 ± 0.75                             | 5.1 ± 1.00        | 0.803                               | 0.977                                                    |
| <b>PS 34:2</b>  | 9.9 ± 2.00                             | 8.5 ± 1.50         | 0.244                               | 0.219                                                    | 9.2 ± 1.63                             | 9.2 ± 1.38        | 0.949                               | 0.977                                                    |
| <b>PS 36:2</b>  | 5.9 ± 0.88                             | 5.5 ± 0.88         | 0.696                               | 0.424                                                    | 4.6 ± 0.75                             | 5.5 ± 0.75        | 0.273                               | 0.977                                                    |
| <b>PS 36:3</b>  | 13.6 ± 2.13                            | 11.1 ± 1.50        | 0.075                               | 0.117                                                    | 12.5 ± 1.88                            | 12.6 ± 1.88       | 0.913                               | 0.977                                                    |
| <b>PS 36:4</b>  | <b>18.9 ± 2.38</b>                     | <b>14.6 ± 1.75</b> | <b>0.050</b>                        | <b>0.084</b>                                             | 16.4 ± 2.38                            | 17.1 ± 2.88       | 0.771                               | 0.977                                                    |
| <b>PS 36:5</b>  | <b>31.0 ± 7.25</b>                     | <b>20.9 ± 4.38</b> | <b>0.024</b>                        | <b>0.080</b>                                             | 25.4 ± 5.88                            | 26.4 ± 5.50       | 0.742                               | 0.977                                                    |
| <b>PS 38:4</b>  | 5.5 ± 1.00                             | 4.5 ± 0.88         | 0.123                               | 0.146                                                    | 47.5 ± 0.88                            | 5.2 ± 1.50        | 0.723                               | 0.977                                                    |
| <b>PS 38:5</b>  | <b>15.5 ± 3.00</b>                     | <b>11.0 ± 1.75</b> | <b>0.019</b>                        | <b>0.080</b>                                             | 13.7 ± 2.88                            | 14.4 ± 2.38       | 0.746                               | 0.977                                                    |
| <b>PS 38:6</b>  | 7.4 ± 1.63                             | 6.4 ± 1.38         | 0.315                               | 0.246                                                    | 6.6 ± 1.50                             | 7.0 ± 1.50        | 0.803                               | 0.977                                                    |

CE: cholesteryl esters, SM sphingomyelin, LPC: lysophosphatidylcholine, PE: phosphatidylcholine, PE: phosphatidylethanolamine, LPS lyso phosphatidylserine, and PS: phosphatidylserine

Data are shown as mean ± SEM of LDL lipid-specimens given as mg/100mL plasma for the CE-species and µg/100mL plasma for SM, LPC, PC, PE, LPS, and PS species.

N=19 / intervention group. \*p-values assessed by paired T-Student test between values before and after intervention for each group. # q-values: adjusted p-values by FDR
