# Supplementary material
Source: PubMed Central journal article supplement (PMC4409281)
Supplement: supp_P052217_jlr.P052217-6.pdf [file supp_P052217_jlr.P052217-6.pdf]

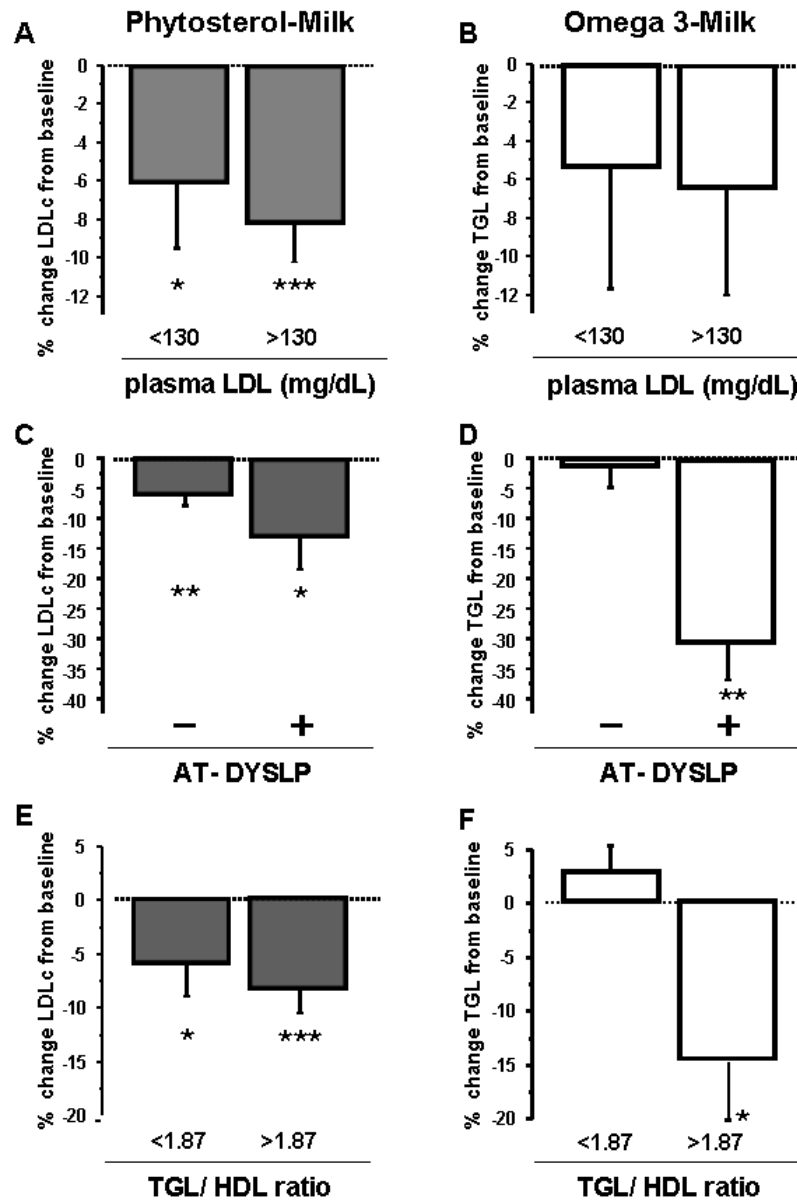

**Supplemental Figure 1.- Impact of baseline LDLc, HDLc, and triglyceride levels on phytosterol-milk and omega 3- effects.**

Percentage of change from baseline in plasma LDLc (panels A,C,E) and TGL (panels B,D;F) after PhyS- and  $\omega$ 3- milk interventions (mean  $\pm$  SEM), respectively, are shown for separated subgroups accordingly to the baseline levels of LDLc (Low-LDL group, n=14 vs High LDL group, n=18; panels A,B) or atherogenic dyslipidemia (HDLc levels: <40 mg /dL in male, <50mg/dL in females; and TGL levels above 150 mg/dL; n= 25 and 7 respectively; panels C,D). Panels E and F refer to % change from baseline in LDL and TGL according the TGL/HDL ratio (cut-off median value = 1.87). \*refers to p<0.05, \*\*p<0.01, and \*\*\*p<0.001 for % change relative to baseline. Comparison by T-Student for paired data.
