# Supplementary material
Source: PubMed Central journal article supplement (PMC4409281)
Supplement: supp_P052217_jlr.P052217-7.pdf [file supp_P052217_jlr.P052217-7.pdf]

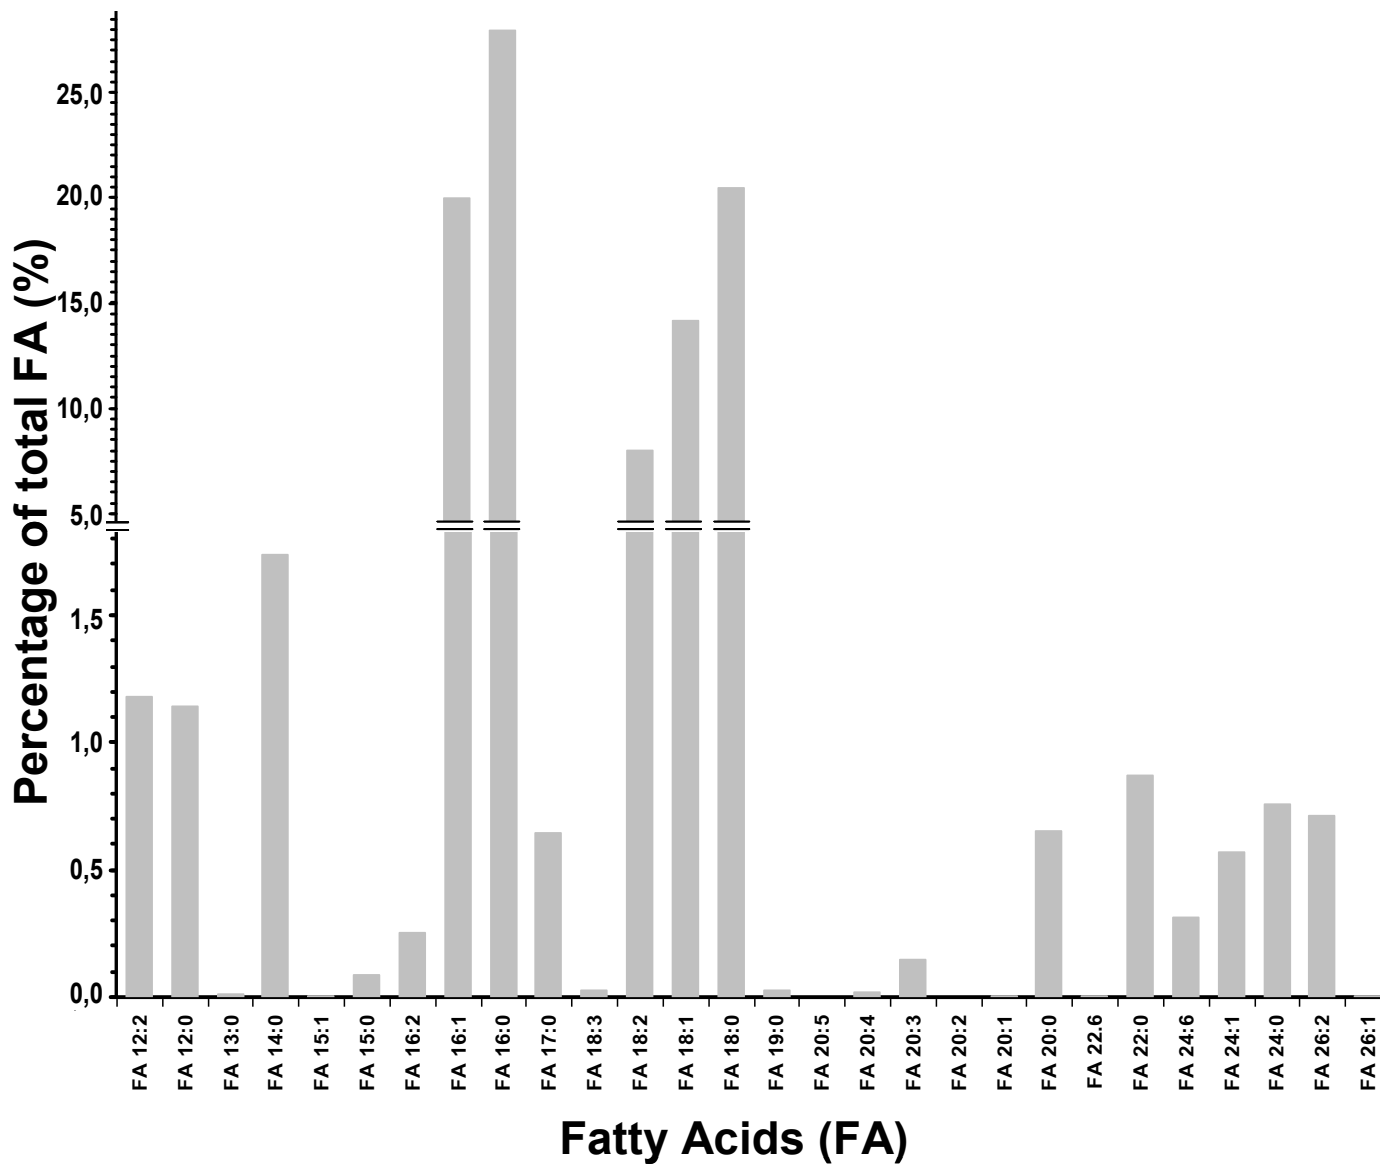

**Supplemental Figure 2.- Plasma Fatty (FA) acid profile at baseline obtained by LC/MS/MS using a top-down approach.** Values are given as % of total plasma FA content (palmitic, 16:0;  $\alpha$ -linolenic, 18:3; linoleic, 18:2; oleic, 18:1; stearic, 18:0; arachidonic, 20:4; eicosapentaenoic, 20:5; docosapentaenoic, 22:6).
